# Supplementary material
Source: PubMed Central journal article supplement (PMC3864551)

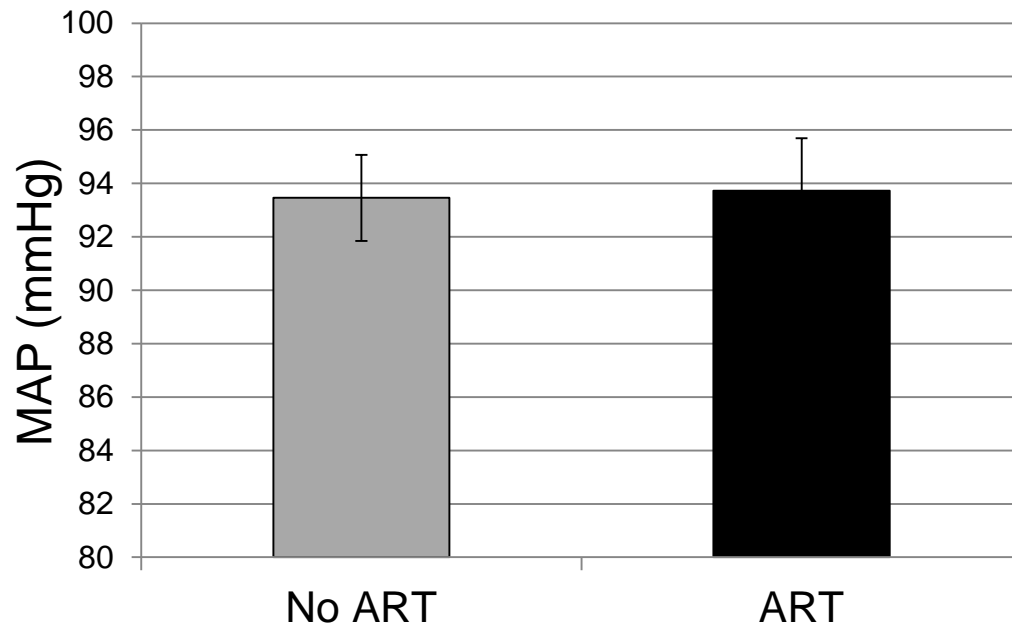

Suppl. Figure 1

Supplement: NIHMS535217-supplement-1.pdf [file NIHMS535217-supplement-1.pdf]
